# Supplementary material for: Atorvastatin promotes AMPK signaling to protect against high fat diet-induced non-alcoholic fatty liver in golden hamsters
Source: PubMed Central journal article supplement — Exp Ther Med. 2020 Jan 22;19(3):2133–42. doi: 10.3892/etm.2020.8465 (PMC7027324; doi:10.3892/etm.2020.8465), 2020-01-22

Figure S1. Quantification of the oil red O staining of liver tissues. Data are expressed as mean  $\pm$  SEM (n=3 per group). ##P<0.01 vs. control group; \*P<0.05 vs. model group. Ato, atorvastatin.

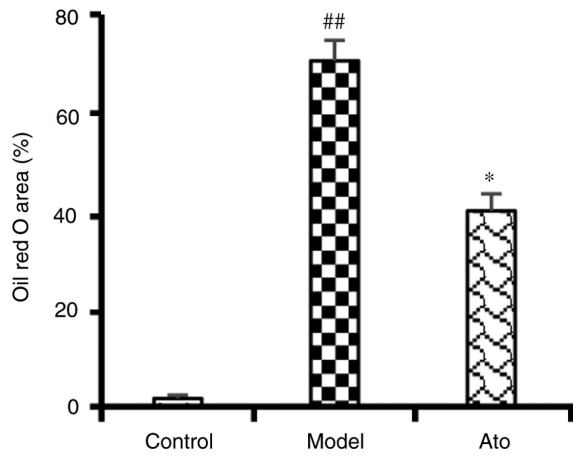

Supplement: Supplementary_Data.pdf [file Supplementary_Data.pdf]
